# Supplementary material for: Design and synthesis of reversible solid-state photochromic pyrazolones by introducing a pyridine ring
Source: Royal Society of Chemistry journal article supplement (doi:10.1039/c6pp00119j), 2016-08-29
Supplement: c6pp00119j1.pdf [file c6pp00119j1.pdf]

*Supplementary data*

# **Design and synthesis of reversible solid-state photochromic pyrazolones by introducing a pyridine ring**

Jixi Guo, Yucai Zhang, Dianzeng Jia\*, Mingxi Guo and Yinhua Li

*Key laboratory of energy materials chemistry, ministry of education; Key laboratory of advanced functional materials, autonomous region; Institute of applied chemistry, Xinjiang University, Urumqi 830046, Xinjiang, P. R. China*

Corresponding author: Tel.: +86-991-8583083; Fax: +86-991-8588883; E-mail address:  
jdz0991@gmail.com

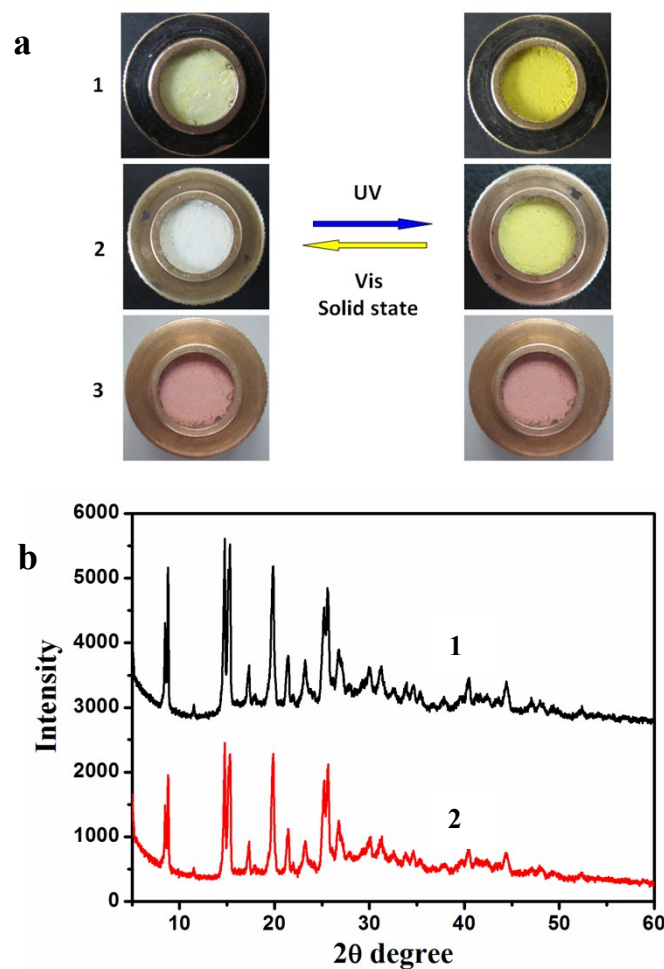

**Fig. S1.** Crystalline powders of 1-3 under alternative irradiation with UV and visible light (a), and XRD of 1 and 2 (b).

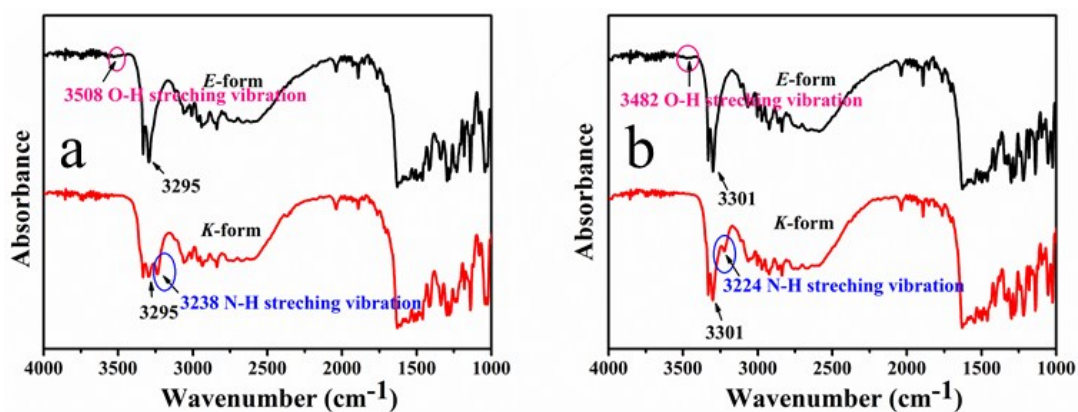

**Fig. S2.** FT-IR spectra of 1 (a) and 2 (b), before UV light irradiation (black) and after UV light irradiation (red).

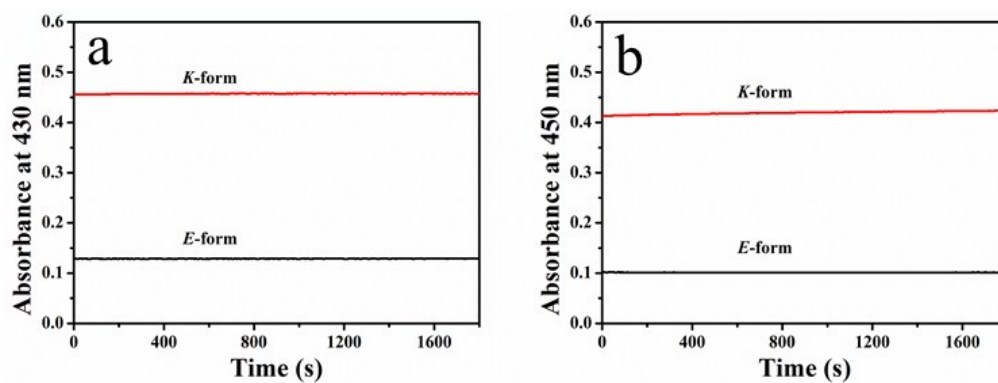

Fig. S3. Thermal stability of the white and colored species of compounds 1 (a) and 2 (b).

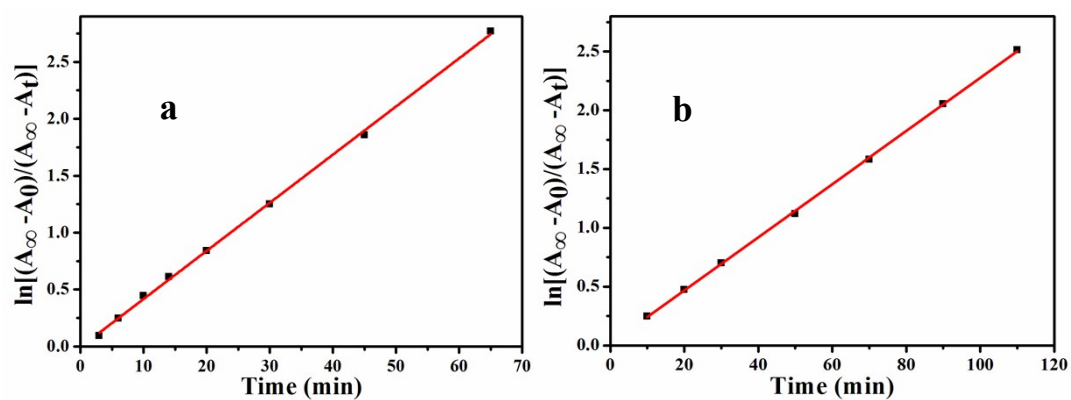

Fig. S4. First-order kinetic plots for the photocoloration reaction of 1 (a) and 2 (b) under 365 nm light irradiation.

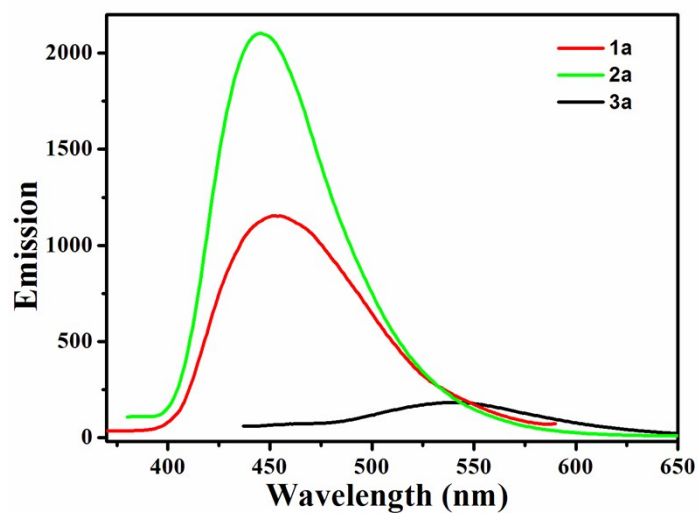

Fig. S5. The fluorescent spectra of **1a**, **2a** and **3a** in the solid state

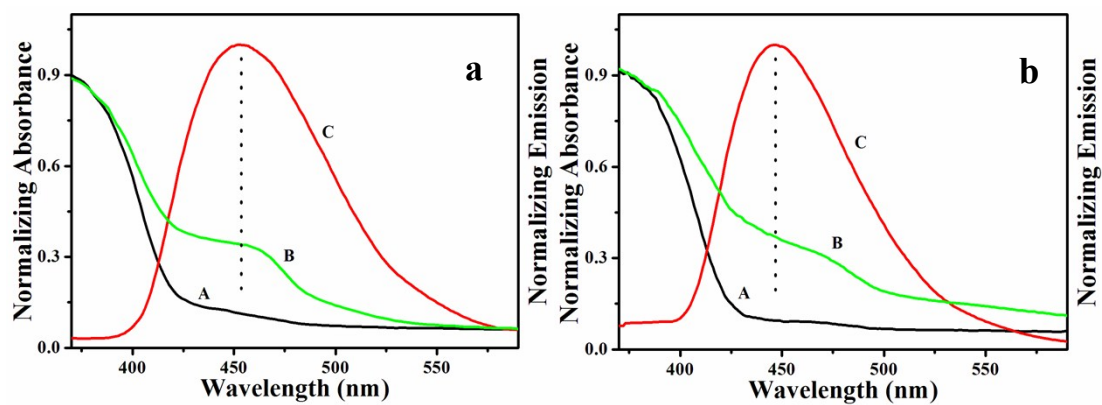

Fig. S6. Normalized emission spectra of **1** (a) and **2** (b) (red line), normalized absorption spectra of **1a** and **2a** before 365 nm light irradiation (black line), **1b** and **2b** after visible light irradiation (green line), respectively.

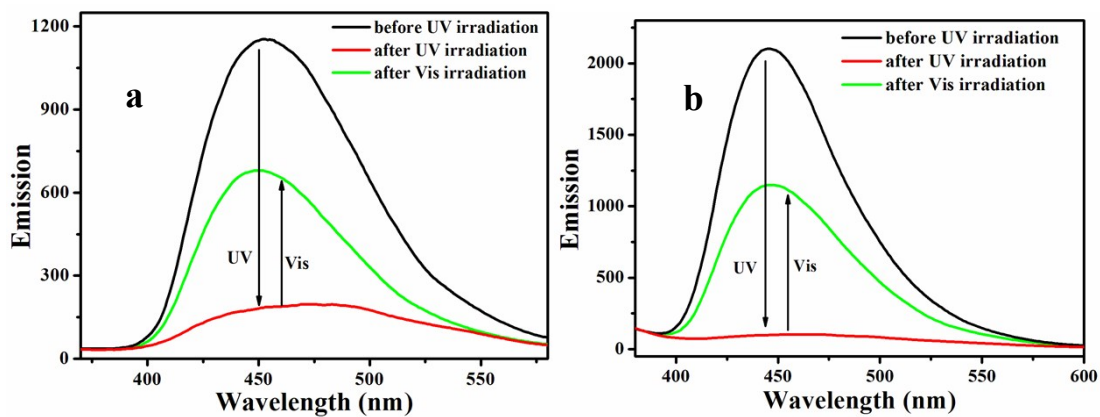

**Fig. S7.** Fluorescent spectral changes of **1** (a) and **2** (b) upon UV-light (365 nm) and visible light irradiation.

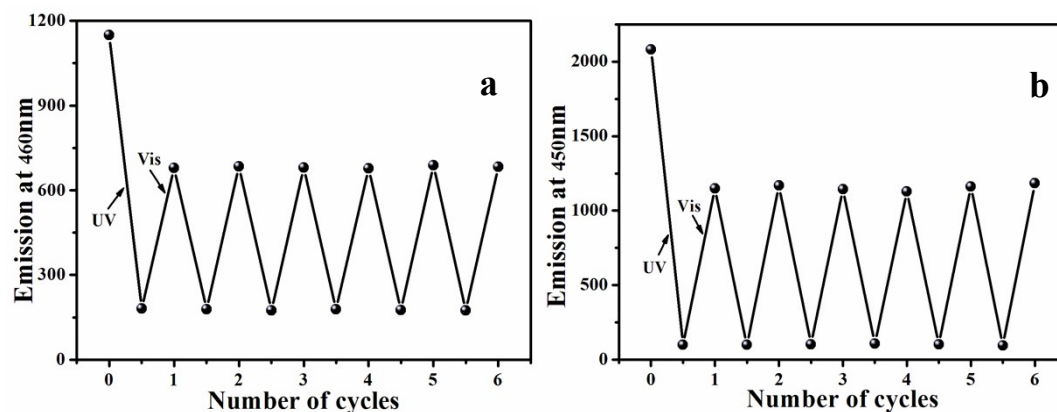

**Fig. S8.** Photocoloration cycles upon alternating with UV light and visible light irradiation for **1** and **2**, respectively.
